# Supplementary material
Source: publisher site journal article supplement (https://www.spandidos-publications.com/7872/downloadSupplementary)
Supplement: Supplementary file 1 [file downloadSupplementary]

## Sheet: Table SIX
Table SIX. The correlation and P-values between the expression level of EFNA3 and mRNA methylation regulatory factors.
Type	Gene	TGCT	SKCM	READ	GBMLGG	LGG	HNSC	CESC	ESCA	OV	SARC	UCS	PAAD	LUAD	LUSC	LIHC	STAD	STES	BLCA	PRAD	CHOL	THYM	LAML	MESO	COAD	COADREAD	BRCA	PCPG	KIPAN	KIRC	NB	THCA	UCEC	ACC	WT	DLBC	GBM	ALL	KIRP	KICH	UVM	TGCT	SKCM	READ	GBMLGG	LGG	HNSC	CESC	ESCA
m1A_writer	TRMT61A	-0.0985283	0.00590228851106762	-0.170273	0.13609536406736	0.0267616711366034	-0.0117778	0.0355218945106444	-0.0248692	0.428083184775885	-0.135502	-0.0206433	0.358620197759166	0.262043865024515	0.297278224295615	0.260831185944139	0.16855175123102	0.140779649369512	0.09131954809745	0.108305878719469	0.0324505597808899	0.247934099572505	0.479881804572071	-0.0360066	0.241806587744654	0.18551409280466	0.191212435920101	0.036684101099586	-0.132755	0.172848127682576	0.157138974275373	0.333872119079504	0.158104053916723	0.220286701190891	0.274550507042449	0.265478604091749	0.268852706535583	0.0541719650333675	0.194160520476792	0.398124789453529	0.34899289405721	0.233501909416538	0.953050851930484	0.104643501621279	0.000445787908545633	0.546911702010012	0.78914614726648	0.537242201939006	0.739651499395415
m1A_writer	TRMT10C	0.146852150868069	-0.160116	-0.15684	0.00862983518367306	0.0455025746850245	0.00733604946862869	0.237457315055112	0.181085358917054	0.530882173421446	0.1629437664298	-0.111375	0.119486550520043	0.231760903763331	0.135534829062409	0.234572680782356	0.337512942370274	0.320385081488248	0.228082104417923	0.266221866600142	0.152075241352007	0.285370724834424	0.0366302705964548	-0.0630902	0.108888257110124	0.0658757241911856	0.141488351109424	-0.138206	-0.131985	-0.190231	0.15636964840915	0.28544535306481	0.344573869441547	0.336654151179657	0.251605438886526	0.323354418893486	0.173944365336164	0.209822741214179	0.0687532594472116	0.0584233798781644	0.161357175686782	0.0749035455680373	0.107934291322206	0.135425428856212	0.824606096394311	0.305555882950932	0.867712702069845	2.87512905726491e-05	0.0147043721891007
m1A_writer	TRMT61B	0.259132303133628	-0.184047	-0.220429	-0.099129	-0.111225	-0.0635359	-0.0219385	0.0600954135965572	0.538335518659648	0.144798945178787	0.163353289745316	0.223760398426204	0.221467908528871	0.190164603142268	0.281887620844935	0.0390924582699108	0.0920346262450205	0.193541039584686	0.189007110278076	-0.0852377	0.103910014473001	0.119690565421694	0.174322509750877	0.0192682575249542	-0.0152588	0.0336979192799485	-0.0580521	0.189205237336753	0.0259918889843942	0.234500172856421	0.348712552970104	0.36383723353626	0.35775018125309	0.042498558031583	0.147431269938624	0.155718438072877	0.118678002723411	0.239079217144899	0.134673870652021	0.237873357715639	0.00147145539788906	0.0640643816040868	0.0347363253027814	0.0107108160859029	0.0120398628655005	0.148733688906279	0.703216925287785	0.421612794018038
m1A_writer	TRMT6	0.327193461749269	-0.199867	-0.119363	0.0384735435970834	0.0175985102691759	0.0312198453079646	0.227233493285787	0.11931386914292	0.559810642738104	0.180963393784098	0.327798843899823	0.221852718496385	0.182478237600218	0.266167419557685	0.388697157110011	0.271220933722461	0.257327238935612	0.263498568204054	0.238262903306381	0.0660653997753252	0.290902550522459	-0.0239802	0.0874049881264598	0.125575879287018	0.0833899483097287	0.0470044578041832	0.0813299501217093	0.143457504923872	0.0445557794746116	0.424892324952637	0.245312075502096	0.448551332490673	0.423873888147113	0.468589933555256	0.329507808382764	0.314688435741696	0.145420636625823	0.258906034711892	0.240175846958782	0.257325161350251	4.92768388791508e-05	0.0440044633885716	0.257093046964108	0.322959298807378	0.69203493846626	0.478319580461866	6.3865545357456e-05	0.109642300637726
m1A_reader	YTHDF1	-0.145513	-0.0319547	-0.100269	0.0304436135085019	-0.0726692	0.153673377526957	0.102401932596945	-0.0559681	0.62601545097578	0.120386173661122	0.24369796460182	0.381465385100511	0.221056795125808	0.257910118837136	0.370745720172617	0.290398872319678	0.225447765825677	0.307229738468651	0.303874486535175	0.270059572254739	0.296668126329941	0.406390875680866	0.207515845043691	0.224321249213159	0.185007310856069	0.0590826558728601	0.11687353970424	0.105041065790834	0.0877041273208338	0.510345744071934	0.476492044392516	0.42659467678839	0.382399338855885	0.481055320469587	0.330676829813607	0.283049163134033	0.341101800836835	0.311845786408894	0.343846801159137	0.405241026956149	0.0776241202156251	0.74985475230163	0.341607586622363	0.43421712578357	0.101499455148363	0.000448161307275398	0.0746233267894844	0.454252814002394
m1A_reader	YTHDF3	0.391488397827115	-0.186152	0.0494248629877086	0.0760347860576822	0.0845697333049505	0.0168749824194989	0.193660775866049	0.0524066813762973	0.557018563928211	0.19948270167865	-0.0609752	0.0866072785726537	0.0335411333615004	0.0639200361722489	0.161429918162537	0.191171070734123	0.180256330736509	0.234635970397583	0.221518291585004	0.234019115909935	0.304998720466469	0.143536616573086	0.212963462418182	-0.0264666	0.00147924461290597	-0.00895331	0.0564721920074556	0.151571284806724	-0.0419044	0.163640099872956	0.31241006352064	0.289912581016443	0.276440523726899	0.236151967831272	0.255274463319091	0.156966975225002	0.210460633253026	0.134681852765718	0.166536932390559	0.449224149088379	8.64969463822186e-07	0.0610294179064066	0.639876846251247	0.0505287225244129	0.0565586504884784	0.701595555922612	0.00068659773343783	0.483517268016104
m1A_reader	YTHDF2	0.101353635783043	-0.154381	0.0843946307523592	0.166057314083992	0.26016739815588	0.0622775416378043	0.216102213135147	0.234788824920746	0.554447682051976	0.284319134176254	0.111018747049604	0.133390151960355	0.287642225835906	0.146758797955893	0.304782381583643	0.268100516518884	0.273640297245293	0.33638279736592	0.239078473582732	0.0700722277162901	0.172236764791028	0.279006576254058	-0.0201685	0.23618137392848	0.203003288422215	0.158135938088367	0.113685812256711	0.39928366478942	0.18656857732563	0.405919468485669	0.406096930488598	0.444297663150401	0.455462799805477	0.416135507225832	0.311713217980949	0.281641548068064	0.251869698850791	0.227520964536905	0.394261381731911	0.278130618888835	0.220302347269405	0.121320397895435	0.423800364859254	1.75226834709711e-05	2.55159525404616e-09	0.156962176428488	0.000146272341840566	0.00146530302116982
m1A_reader	YTHDC1	0.440812996464719	-0.105791	0.175768904455326	0.317183908187909	0.178417579954567	0.0796069427868178	0.161882994859604	0.129177783027383	0.560186465479755	0.316143906048073	0.158721209077494	0.126448711995907	0.0632050719808441	0.22475070805891	0.244357724704775	0.177316676980068	0.218201070768767	0.25112687332153	0.206838742911318	0.31887221217185	0.210781069670412	0.117512573599954	0.0986086124360122	0.196053264395474	0.201648550493237	-0.0630005	0.137342682100758	0.339389391147819	0.197879436507008	0.382491228484988	0.415864812861816	0.389425643862423	0.368207757491767	0.495465818330553	0.336500812275634	0.410069829601233	0.236012613117688	0.266369938280795	0.112187727698273	0.258397235910725	2.05761597317113e-08	0.289947306205251	0.0937499413831992	6.14563908488767e-17	5.16767032683078e-05	0.0702461589471501	0.0046608325369693	0.0830711585558789
m1A_eraser	ALKBH1	0.0152459927614329	-0.164183	-0.0222945	0.0291952299277801	0.0307718904589027	-0.0209254	0.0391522061343302	-0.0537576	0.546319524323192	0.120045225640087	0.164086766849329	0.0954312568529182	0.18775651468831	0.223180870339726	0.190303796675508	0.16152065471359	0.141371860267997	0.290664790717134	0.213490623419992	-0.0402052	0.248318194325897	0.389574339459606	0.0582431831108108	0.0519240206743348	0.0292864489056147	0.0526716288041621	0.191604809370224	0.0976480795451664	0.00702763081169851	0.458639331880962	0.432805241249311	0.374916573143425	0.351172402293459	0.168320073973739	0.300451694376219	0.214083625315856	0.294351700846187	0.182500422193862	0.0930932638686779	0.317026838329507	0.854081270003301	0.0991595209471265	0.832931037324373	0.453305993106626	0.488496149464629	0.634675654421409	0.496447088499779	0.472298824491582
m1A_eraser	ALKBH3	0.122131835847456	-0.12587	-0.119279	-0.0837501	-0.0883771	-0.14985	0.0564386580043343	0.139165218396097	0.465791027952816	-0.0444887	-0.0327698	0.113378136745061	0.107649100788697	0.159508080576303	-0.024346	0.0494802720138004	0.0944714937723546	0.0420872031704834	0.112766270890103	0.0403403803532777	-0.247015	0.237105575032476	0.241131556834885	0.0801065394829059	0.0641171926551921	0.0636103831055993	0.0884959982005866	0.16059997386943	0.16990981329912	0.274938699891198	0.205884644924769	-0.0233733	0.30800803779087	0.187105457219948	-0.126111	0.0391201313396458	-0.0286584	0.137553147847915	0.198215622718292	0.129330268953715	0.139209418070212	0.207460538447478	0.257426907793198	0.0311969759614457	0.0462749729904459	0.000622482613123836	0.32670633150083	0.0617053129823946
m5C_writer	NSUN7	-0.0562825	0.172750367511447	0.0235911734853447	-0.245383	-0.208211	-0.086894	-0.184098	-0.335011	0.468459259992163	0.205785827060019	0.19061018142619	0.296633483300895	0.09014611289828	-0.00510434	0.140971330476284	-0.108218	-0.147779	0.13392192707086	-0.0666226	0.47098997903572	0.130102094472338	0.0269738094929304	0.128627126593453	0.0760827844740441	0.0679157461933066	-0.0465548	0.192049692531848	-0.393344	-0.20258	-0.0479206	0.465126588053702	0.192158985967525	0.253429045357737	0.295322521636106	-0.201061	0.0294304177425256	0.0178126256679549	-0.0601819	-0.145346	-0.220509	0.496859241174063	0.0825161686837308	0.823367549804999	1.55681077160812e-10	2.15924196032667e-06	0.0480826628269599	0.00126311955534686	4.03053868379042e-06
m5C_writer	NSUN6	0.473904949364162	-0.057533	0.0528132648957846	0.322918528906551	0.206326536186662	-0.040341	0.0675507196997838	0.0500383482560998	0.502381050535407	0.361259700008952	0.139499656182211	0.110082677568365	0.0939647224621898	0.104979678689388	-0.133833	0.121728177287435	0.123580587794668	-0.0921863	-0.0581305	-0.0923435	0.19258542985063	0.279638135923035	-0.00813785	0.0661549927646544	0.0700861532622189	-0.0344913	-0.102845	0.200472325286564	0.169701516421742	0.458780640095354	0.379349089003032	0.408401312098205	0.527211041577062	0.449682676889897	0.475305579325747	0.330199106659979	0.191312986922421	0.253270458175902	0.152339945468984	0.312047458502142	1.17403756183021e-09	0.565717609759994	0.617082056573369	1.56630465876729e-17	2.67789404472853e-06	0.359509392459535	0.240284204570812	0.503525869092189
m5C_writer	NSUN3	0.164990925052646	-0.188497	0.21325137768899	0.071741093481375	0.0224323106943472	-0.000911041	0.0325229254846653	-0.10963	0.449505956051874	0.1170494813733	0.0890279654883394	0.172401103395882	0.00873449536739998	0.0758591747640374	0.146006655182014	0.089787563610651	0.0561342303831813	0.230892843010129	0.247863717091282	0.405218270531518	0.210589467496431	0.00943182511844039	0.118491115518448	0.0570554423698404	0.098733275010477	-0.0473144	-0.0818074	0.157842903199697	-0.00494427	0.139549847718106	0.320689354336973	0.253751544785505	0.289890538469682	0.313628545230337	0.346790238655299	0.243794494141676	-0.00445352	0.167354840654125	0.0477229062397667	0.130064411594905	0.0450767293324772	0.0577874314810218	0.0412498199253755	0.0650751420803024	0.613618354584834	0.983497059687906	0.572162211596748	0.141796201422879
m5C_writer	TRDMT1	-0.0836607	-0.137592	-0.132003	0.0738333338183158	0.0450877545522803	-0.0613506	-0.0801571	-0.0586641	0.476448844237092	0.112620325079302	-0.0264333	-0.0848637	-0.0725136	-0.0254754	0.154428113474965	0.0568078599473783	0.0353991809202337	0.114608001514264	0.164920496087766	0.271325741208135	0.123027825440567	0.128929064867878	-0.0130376	-0.150945	-0.145514	-0.0561839	0.0129770094107062	0.438841685212537	0.205950092096206	0.226306690477349	0.225297460307266	0.213789676684994	0.23600127806899	0.107236634896095	0.316547065589393	0.154815354291478	0.214989879649232	0.117138196649226	0.168335	0.160556505298578	0.312054541299439	0.167877904755924	0.209726972865917	0.0576057211968051	0.309990701251243	0.16323995740998	0.163295389382005	0.432774883407486
m5C_writer	NSUN5	-0.2632	-0.0620603	-0.0241382	-0.196403	-0.187004	-0.133611	-0.0572373	-0.0764938	0.514930392070942	0.00423566586153901	0.0116515761628738	0.294764264559975	0.373451118856719	0.2175784014272	0.414627374841117	0.244926364910419	0.198104584362049	0.244242884419278	0.0486655253713289	-0.0819501	-0.201311	0.152344702162354	0.207473089748125	0.262854463243762	0.222976898111568	0.161721302782791	0.133468108061024	-0.18654	0.113931727561878	0.463863968017103	0.181757195066837	0.29536434592746	0.428324661517255	0.461174413263766	0.413213134390723	0.0937288296214464	0.174129840830852	0.289188378410595	0.386967137248524	0.266700210786403	0.00122927769423455	0.535487178396354	0.819340517770295	3.51597914024161e-07	2.17483135376021e-05	0.00230930375356007	0.31989614261624	0.306076571792555
m5C_writer	DNMT1	-0.286238	-0.194203	-0.179369	-0.0991622	-0.147185	-0.249917	-0.179284	-0.0423231	0.433331833350719	0.169085936722122	0.00763594125569885	0.238329964857766	0.0554256954492661	0.0868308324529905	0.393798959997964	0.217018466171598	0.18179210487137	0.245408362383377	0.335680839407936	-0.293681	-0.0158174	-0.0208406	0.258969315674066	-0.0347407	-0.0806125	0.0765911383957922	0.0409770491062473	0.345755141152415	0.194243106204083	0.436223552497807	0.418523537678316	0.160972000198384	0.432827866388802	0.504722930897043	0.382540964048814	0.235276164309579	0.298296593692278	0.366027863003484	0.543462727152245	0.61105745976516	0.000420622251509618	0.0504828712906059	0.0871135961855853	0.0106844675941923	0.000866469892355064	8.11692265818992e-09	0.00169802381853409	0.571592114514342
m5C_writer	NOP2	-0.223758	-0.0804526	-0.221627	0.00250740895702231	-0.0451322	0.0144996470752465	0.0246216044162415	0.129219605402126	0.481241664058785	0.107824652148413	0.279052749517725	0.0994097152496411	0.174313177482161	0.123941551977723	0.358755095105866	0.327470751367493	0.310617781397461	0.107832023845831	0.0929394168585964	0.418653865725353	0.232295448055968	0.188151455276914	0.0998376026875223	0.101909366145453	0.0340419339381866	0.110646746114482	0.0403249683948554	0.223819693978387	0.194082298491649	0.312930396853167	0.37257629048384	0.341771068405945	0.36567799194235	0.527124636256097	0.153182124563127	0.233125231545215	0.350233853874547	0.29698673890317	0.445399896199214	0.54853196835667	0.00626062236907727	0.421500359933451	0.0337381427704503	0.948657934181409	0.309513228663758	0.741984542649571	0.66895063631231	0.0829706543899463
m5C_writer	NSUN2	-0.104084	-0.122705	0.0852547431377102	0.0218208762495366	-0.120548	0.0451330020760158	0.180514188648368	0.0998611813201041	0.471645833553692	0.240634739307187	0.15812194112136	0.389338695770488	0.319487338320086	0.215550840466389	0.291027593642589	0.316755860559487	0.304475846540911	0.281957033878811	0.348968731025459	0.0531302346555945	0.274601990741373	0.110861538507347	0.105936232034612	0.22559526496961	0.193241745600982	0.0989915953874658	-0.00200585	0.233530716981797	0.184443223563248	0.307321212064183	0.434814516202215	0.367254754315805	0.267638661434402	0.497000283881949	0.301604995138891	0.270587396692962	0.305754132376122	0.277901579194172	0.447857450889926	0.364499297896594	0.208059926877702	0.219208739521042	0.419075173579459	0.575177384529634	0.00647050734408809	0.305244943008383	0.00157548153936757	0.181048804952144
m5C_writer	NSUN4	-0.097535	-0.0941414	-0.013314	0.125787700431008	0.182895901352546	-0.00283886	0.132846630773965	0.153761906298396	0.501018928365465	0.203318544888263	0.172977564675116	0.112810657269639	0.227820242660436	0.175866289995429	0.306054865378325	0.276679989688416	0.273654962197836	0.321915115661966	0.223820995176607	-0.0267022	0.2619119848929	0.305282403252301	0.0532069738000898	0.175416295602708	0.118841161894158	0.00547123227583762	0.0238838737307804	0.345270521405032	0.25438800386191	0.102373239266641	0.208637036092477	0.290754338431269	0.379424359786611	0.254082140077644	0.130756052554497	0.277331285073013	0.187879506172494	0.329009852385444	0.287279160593503	0.209642824595154	0.238271784515197	0.346625138932081	0.899761563471072	0.00118190647114121	3.30677165980044e-05	0.948607594573888	0.0205039134299834	0.0387691086849233
m5C_writer	DNMT3A	-0.36561	-0.0775169	-0.0644395	0.0187754508519968	0.00437648689223816	-0.0452014	-0.0337319	-0.0554577	0.639829696787748	0.423624067755136	0.199768203319066	0.192690526392361	0.266041420344483	0.190269295956015	0.343602294082434	-0.0172804	0.00526330613330069	0.156350987079645	0.169118855381379	0.24888166891896	-0.0418594	0.383838999135661	0.323742918182956	0.0618272283958929	0.0553337251564892	0.150390383131343	0.114048330941528	0.342919623739843	0.277618880693372	0.501253763627491	0.470299546350559	0.334960303928601	0.410667816306184	0.534883999870053	0.165051635122621	0.260454073239522	0.187536380807957	0.169271207755968	0.175502692410717	0.420124244586922	4.89293420665438e-06	0.438694339010068	0.541685893226255	0.629656845592822	0.92153863734598	0.304511360475568	0.557956550972349	0.45838506270695
m5C_writer	DNMT3B	-0.55527	0.361343207709598	-0.170271	-0.0168157	-0.0307685	0.1896349659619	0.101508255395519	0.110916692309627	0.459118865196209	0.317603585235246	0.244727179710473	0.105289034372972	0.257248405685446	0.294744290474961	0.329667545153492	0.278517986919178	0.275082659887324	0.241306295474951	0.250236815645027	0.227674197178825	-0.0397326	0.473467287991303	0.389313373841124	0.00677653241474188	-0.0184726	0.252336778276898	0.138435828626325	0.304605861592374	0.358718287529135	0.50081548534138	0.284307363013804	0.259034457980669	0.100960340127212	0.4072664789595	0.261210982708321	0.235021708030482	0.292192943667666	0.435847365641885	0.519913497914002	0.393316117576358	2.40440857791756e-13	0.000190488745040483	0.104647245149941	0.665834912742468	0.488544641784018	1.39225031685787e-05	0.0772059831256732	0.137151248344208
m5C_eraser	TET2	0.4941098654058	0.015979429110169	0.0551126428093733	0.189356102146589	0.0696554687598591	0.182057045055295	0.199877792686629	0.313324665746682	0.477751509231874	0.287865196955527	0.108430526084523	0.130750242976236	-0.0610223	0.195305863762526	0.160328747631204	0.176452209960192	0.262057228760427	0.237494735845784	0.169030342963846	0.26333951495077	0.272596951936682	-0.239439	-0.0320676	-0.1549	-0.123181	-0.0343416	0.198266494832894	0.26866274849108	0.133875970486654	0.195578986671006	0.405184457188548	0.257023995844077	0.26472076088893	0.34534511277884	0.178415846321537	0.280517152328978	0.0688514152693915	0.258022929914862	-0.0163074	0.282054861887288	1.74810022530063e-10	0.873349409118269	0.601815800886513	9.23542098713262e-07	0.116521659090482	3.06713148458813e-05	0.000454765011946697	1.74855932337898e-05
m5C_reader	ALYREF	-0.275007	0.0800742450023462	-0.373663	-0.0740097	-0.0897211	-0.212388	-0.134456	0.0476267815893722	0.504301660694042	0.14899080552855	0.350349951158626	0.207317355922312	0.264445146096961	0.206191797157358	0.387024657294467	0.356779814310013	0.290766502539781	0.247528490064389	0.278926906400128	0.0751439685491091	-0.190017	0.186275071022383	0.107505235612727	0.114061081135187	0.0255505198399055	0.0789602005711543	0.0733384271058168	0.224833058453498	0.225334330959959	0.360635394967505	0.343746674202742	0.28857053188221	0.436304909883237	0.527053355961585	0.361347152126219	0.330605547230218	0.192718260296314	0.308615833118339	0.371161154075844	0.315751118237076	0.000717756712706234	0.423693976025076	0.000243610490683791	0.0570100672402786	0.0430417231692461	1.07188427782664e-06	0.0190106064436747	0.524336535540777
m6A_writer	KIAA1429	0.622655126333481	-0.278759	0.118457283612169	-0.0371311	-0.112844	-0.120176	0.103546092241146	0.0932334405139053	0.458602017030045	0.195725667504585	-0.0129638	0.33107541544386	0.151936160593381	0.222244874787603	0.353353848665297	0.223391854174354	0.227161365891032	0.135718292612647	0.149651464632396	0.110888228296687	-0.104867	0.0775242598037957	0.299154899124955	0.155480969719595	0.163845806206811	0.0214181907975653	0.0715188860040895	0.581282150285299	0.461828446469592	0.309115781876242	0.503364455468612	0.280085199604544	0.243931108730019	0.321047720412198	0.191488254044794	0.171979522610966	0.292026499645462	0.302098670010589	0.494940589651302	0.47331151464413	2.94222284081613e-17	0.00455251760233617	0.260744821673563	0.340142525931003	0.0108413814152795	0.00617234419644494	0.071419771947383	0.211899797077248
m6A_writer	RBM15	0.0918484796753701	-0.166724	-0.114145	0.195393591225217	0.110214565940814	-0.130961	0.0929396150326846	-0.135793	0.476364507012731	0.232663101893978	0.0615426453206585	0.236520786470206	0.141125886941165	0.123774054631556	0.337098900926952	0.176950861113396	0.144233179956378	0.276772248628435	0.128022098523089	-0.0263567	-0.102437	0.273260468608295	-0.0783948	-0.130322	-0.136735	0.0288883307470411	0.0925330218556367	0.419825395545924	0.204547064082567	0.304006395737549	0.1444661781103	0.109447627968048	0.398969898785936	0.367890554248718	0.309229317501579	0.426024216552094	0.296436447764017	0.266777925619305	0.355155051306296	0.274100554402529	0.266887265756428	0.0939683967304596	0.278624776146177	4.04627429103073e-07	0.012845491190595	0.0028237786234275	0.105816972517567	0.0683488102166455
m6A_writer	WTAP	0.135476733959888	-0.0364496	0.06250678856631	-0.131589	-0.0325883	-0.0725143	0.0710028759671705	0.122025741099149	0.527624740122268	0.0392898733421301	0.230105291065262	-0.0503228	0.0525568690045201	-0.00709231	0.336521659984438	0.241700312221337	0.252232570209356	0.246124431258905	0.0649727320239521	0.0312398285077771	0.0550605791210404	-0.070176	-0.0528651	0.0710426295018601	0.0758276409711542	0.0429646587322153	0.0408047402489573	0.452850487146487	0.157322040762366	0.210149772991488	0.387873936245575	0.342373701287362	0.290894691950532	0.338195340064146	0.30329024878388	0.0756906989469112	0.189315580379166	0.243345523892034	0.0895496111171621	0.25465477247517	0.100641991271961	0.716076747576197	0.553900168154017	0.000688595199595022	0.46318485293211	0.0992336647833989	0.217040494747853	0.101748398148133
m6A_writer	RBM15B	-0.0604188	0.164844699675361	0.0142353210148397	0.203377073318242	0.132842422340588	0.0129996422402152	0.0554711092979377	0.11306954938456	0.588115230799006	0.323864300572189	0.279498871472623	0.0736905113799851	0.193716504560681	0.224151999209191	0.332373189147659	0.298782398907303	0.270282378447737	0.220907768345819	0.321536456763029	0.278984831018864	0.086389331368199	0.285798974332096	0.331173245850755	0.244926001810706	0.208391699167862	0.167077620777909	0.00559153444608254	-0.0168486	0.126529735079833	0.296464793298026	0.518646649837428	0.453184488128777	0.370770660145511	0.512843957356746	0.279629704090167	0.333590531085972	0.222434404916009	0.336035217142799	0.443776540372419	-0.299686	0.465719973100929	0.0977868812247204	0.892864620102351	1.30507357458719e-07	0.00267321178622779	0.767868184780328	0.335081112904091	0.129640646787882
m6A_writer	METTL3	0.179345299968131	-0.226544	0.0518034013545226	0.137708001840322	0.0736003248733471	0.00329874400425989	0.0360392327816637	-0.0239499	0.517030319655966	0.267834402593835	0.340385177208243	0.109393716580794	0.139165712689469	0.214888181553281	0.271987227531887	0.285492527228991	0.241307399592964	0.142340020098536	0.163161476834443	0.325915300816224	0.196281923952927	0.288649884936272	0.110047091960102	0.110324952304968	0.0750200980837016	-0.0171384	0.0938985775497628	0.0903145164768214	0.0915652115748291	0.524049189440742	0.467467010945541	0.398223802394629	0.477239448475579	0.257781253604175	0.327048461857096	0.219161096255441	0.215600380664591	0.221579133241902	0.235394537421531	0.343037474293537	0.0291800310041362	0.0220422290933231	0.623839144315242	0.000380307100110797	0.0971829659548698	0.940296689565132	0.531327899217592	0.748947847091962
m6A_writer	CBLL1	0.333699695747678	-0.150184	0.149170259859912	0.123805485417339	0.0750859227391804	0.0560706152742141	0.243375015191927	-0.0153936	0.506336646118719	0.21008913968894	0.253258236860547	0.127774216750082	0.141789457959458	0.189254520395116	0.210207880615261	0.255022896324985	0.198123534999578	0.33469857315411	0.0592552389593657	0.122801688910274	0.225054900582936	0.132841179112357	0.170966906063311	0.0420595002855299	0.081796240631057	-0.0308837	0.0686438792515846	0.140144202183405	-0.0197682	0.51384787070324	0.166320744100401	0.387336978582221	0.291733308087258	0.375067668253069	0.366680611296397	0.29869	0.210811010689514	0.175192682468421	0.0755508872319374	0.306482253444219	3.40333678909664e-05	0.131901425196993	0.155845970827223	0.00141436642197668	0.0906001728521593	0.202640357491506	1.78196424344346e-05	0.837042960196642
m6A_writer	METTL14	0.0296979178443796	-0.149906	-0.00916757	0.134864250017469	0.0191555450022924	0.0612032026840818	0.0955125647941999	0.0386414898225421	0.439692507269237	0.190978151366794	0.156118280676015	-0.0417288	0.0854445636863965	0.0504248713770476	0.0438435083271694	0.188567824825504	0.156914310685005	0.265463564318308	0.203138163978936	0.173358147273175	0.240506821181024	0.221539890029603	0.0794332715664916	0.088101559698987	0.0520596734546767	-0.086131	-0.0384466	0.14231665282096	0.0454889540100932	0.265167146992951	0.226153578509588	0.36394837596535	0.177217602045064	0.384243920997262	0.327706810971512	0.316956568243287	0.305264422107342	0.03526257470299	0.0414430961774639	0.195548637173378	0.720113990179497	0.132626394489027	0.930884737553784	0.00050268658323787	0.666362334772944	0.164255675862708	0.0964606162118497	0.605533643815847
m6A_writer	ZC3H13	0.156828572244893	-0.304535	0.20939326764809	0.233252107865683	0.108664195647326	0.0817107448324667	0.0547595611991192	-0.0436351	0.487604766672493	0.255223264832267	0.120777808218576	0.0982186105082164	-0.0144409	0.197504828216626	0.012009577595658	0.0532124658813596	0.0709936217645528	0.193680410746525	0.140174261862827	0.322336120966509	0.168106315030345	0.00771183159626691	0.178878868621411	0.250261500885684	0.257185752530054	-0.0710633	0.0364931844726704	0.271953860989003	0.115841394311103	0.397582211132398	0.261658974903946	0.345722237722887	0.267350516391367	0.487155474507624	0.326343308670024	0.230058496222451	0.21858489971089	0.185532439619267	0.0791535878569077	-0.162697	0.056972590082924	0.00185817033098317	0.0451520453357599	1.24712833426996e-09	0.0141742995519009	0.0631234910441544	0.341327061280779	0.559717653537499
m6A_eraser	ALKBH5	0.330707933748068	0.0218204592965888	-0.071631	0.297790880960396	0.238697483993965	-0.0742753	-0.0921533	0.0963675627091715	0.6170910392301	0.0614168487227498	0.0174939963861184	-0.0286874	0.141170252770663	0.237026695678936	0.203919023460961	0.129028839313823	0.169554401852382	0.286184569710545	0.185020133980549	0.240311963634054	0.128846968727478	0.180569022946993	0.360258870748483	0.120489108518931	0.0785897483729138	-0.00376404	0.16559972613924	0.599722480542717	0.452908278230979	0.0492403941827633	0.333250759661047	0.367055924703368	0.534868204521674	0.479055293101157	0.486930223417458	0.436859168377051	0.473218266777883	0.444339984608272	0.493391032222057	0.447876263843264	4.03894138666856e-05	0.827673999251748	0.497430218024584	5.04758520116961e-15	5.00846451704103e-08	0.0912719278226316	0.10881510247881	0.196871424497152
m6A_eraser	FTO	0.268877492520517	-0.0542243	-0.0424826	0.369435619092085	0.311127578409136	0.0801258759626225	0.0564316288478189	0.0801522568575779	0.516854582840975	0.213775120406418	0.162499243187461	-0.06908	-0.0868628	0.0770506478483115	0.0872710889151296	-0.0809369	0.0272025697860974	0.258318956667469	0.171940518637615	0.0626694941373307	0.187211087736185	0.158368287512976	0.208075311959276	0.126836845604586	0.0892578691790101	-0.0336833	-0.0229977	0.520752239632329	0.295221388550953	0.297248518996221	0.231856678147379	0.353045175202652	0.222300846501411	0.447276099193627	0.238321713968624	0.337225917631175	0.256749313729515	0.186790504081075	0.172306862663039	0.221587055344531	0.000951905933650116	0.588309407869542	0.687618348335484	7.75990866182383e-23	6.91571989555728e-13	0.0684308626983751	0.326766681434322	0.283453236009048
m6A_reader	YTHDC1	0.440812996464719	-0.105791	0.175768904455326	0.317183908187909	0.178417579954567	0.0796069427868178	0.161882994859604	0.129177783027383	0.560186465479755	0.316143906048073	0.158721209077494	0.126448711995907	0.0632050719808441	0.22475070805891	0.244357724704775	0.177316676980068	0.218201070768767	0.25112687332153	0.206838742911318	0.31887221217185	0.210781069670412	0.117512573599954	0.0986086124360122	0.196053264395474	0.201648550493237	-0.0630005	0.137342682100758	0.339389391147819	0.197879436507008	0.382491228484988	0.415864812861816	0.389425643862423	0.368207757491767	0.495465818330553	0.336500812275634	0.410069829601233	0.236012613117688	0.266369938280795	0.112187727698273	0.258397235910725	2.05761597317113e-08	0.289947306205251	0.0937499413831992	6.14563908488767e-17	5.16767032683078e-05	0.0702461589471501	0.0046608325369693	0.0830711585558789
m6A_reader	YTHDF2	0.101353635783043	-0.154381	0.0843946307523592	0.166057314083992	0.26016739815588	0.0622775416378043	0.216102213135147	0.234788824920746	0.554447682051976	0.284319134176254	0.111018747049604	0.133390151960355	0.287642225835906	0.146758797955893	0.304782381583643	0.268100516518884	0.273640297245293	0.33638279736592	0.239078473582732	0.0700722277162901	0.172236764791028	0.279006576254058	-0.0201685	0.23618137392848	0.203003288422215	0.158135938088367	0.113685812256711	0.39928366478942	0.18656857732563	0.405919468485669	0.406096930488598	0.444297663150401	0.455462799805477	0.416135507225832	0.311713217980949	0.281641548068064	0.251869698850791	0.227520964536905	0.394261381731911	0.278130618888835	0.220302347269405	0.121320397895435	0.423800364859254	1.75226834709711e-05	2.55159525404616e-09	0.156962176428488	0.000146272341840566	0.00146530302116982
m6A_reader	HNRNPA2B1	-0.0587484	-0.226782	0.0102410201377311	0.0194955058881696	-0.111308	-0.0448458	0.0538772240850969	-0.0758516	0.552582669637233	0.338981301181613	0.340552652004729	0.261914398819616	0.21944113168234	0.162875789097696	0.333767050354728	0.32788303008989	0.255136792945024	0.343745475600627	0.306966371337142	0.205616132153143	0.0654883753588599	-0.135934	0.123749048454878	0.220927805033372	0.191110288130714	0.0814415208748975	0.00400956878622982	0.200091339372188	0.112641020759211	0.539849407626498	0.465216168600834	0.449900072339928	0.497050811433952	0.536699422186593	0.371753735276427	0.22641252320184	0.242020926361707	0.25343136787284	0.209860920130604	0.388813810329215	0.478164608580144	0.0218991883834814	0.922815421299284	0.61657768076563	0.0119758012992084	0.308336299880462	0.349174480782327	0.310166809895612
m6A_reader	HNRNPC	-0.0919516	-0.150779	-0.113034	0.095573098902677	0.0616371714475319	-0.0770237	0.0148519214559261	0.145733158749406	0.610107857736754	0.428528216054785	0.278137421281047	0.352892023533886	0.309582801827605	0.18002645302484	0.406392812130906	0.377241017532804	0.34638657471935	0.345134916413323	0.372245700050179	0.19429978871108	0.0371893154118753	0.0558882972296297	0.113273110033284	0.109588332328721	0.0626200007417507	0.0952528530629028	0.185565069024083	0.507066732302605	0.305415608790278	0.389545199135686	0.534594185837633	0.487961694286335	0.578275903781275	0.416341663506856	0.262099754369574	0.262901397837263	0.314939851543607	0.36648138143923	0.298757531872816	0.339271605114657	0.266348180559979	0.130359234282996	0.283357615943258	0.013892894759824	0.164984984800021	0.0798776513208774	0.796484443975708	0.0502864722167521
m6A_reader	YTHDF1	-0.145513	-0.0319547	-0.100269	0.0304436135085019	-0.0726692	0.153673377526957	0.102401932596945	-0.0559681	0.62601545097578	0.120386173661122	0.24369796460182	0.381465385100511	0.221056795125808	0.257910118837136	0.370745720172617	0.290398872319678	0.225447765825677	0.307229738468651	0.303874486535175	0.270059572254739	0.296668126329941	0.406390875680866	0.207515845043691	0.224321249213159	0.185007310856069	0.0590826558728601	0.11687353970424	0.105041065790834	0.0877041273208338	0.510345744071934	0.476492044392516	0.42659467678839	0.382399338855885	0.481055320469587	0.330676829813607	0.283049163134033	0.341101800836835	0.311845786408894	0.343846801159137	0.405241026956149	0.0776241202156251	0.74985475230163	0.341607586622363	0.43421712578357	0.101499455148363	0.000448161307275398	0.0746233267894844	0.454252814002394
m6A_reader	ELAVL1	0.0949092620073881	-0.0959107	-0.15697	-0.139546	-0.145688	-0.0968484	-0.027692	0.0937452887902571	0.603193723506837	0.295577929595932	0.0692324192693121	0.35011132352829	0.22726660920174	0.150113822565722	0.215000810689688	0.268029924271185	0.249573820771573	0.198428893611384	0.310389713936733	0.133529470316805	0.160387816348066	0.244920767458136	0.326858887936464	0.203218512252738	0.126873176139218	0.13350042722456	-0.0341179	0.109166064330566	0.070280153853565	0.0819667199272107	0.516590106991009	0.472028065634909	0.479188993984803	0.508632243382538	0.410910761633584	0.193227416535682	0.327599110090435	0.254513202623515	0.277588305056547	0.328662340106861	0.25120674882414	0.337596400132728	0.135097103773779	0.000316654483807618	0.000979335867940906	0.0275180025145948	0.630566772508206	0.209390843839724
m6A_reader	FMR1	0.00632074854929429	-0.218914	-0.0940524	0.217683285730903	0.0956423637317212	-0.0548097	-0.0389009	0.0682859012962999	0.358606479793719	0.267954942069172	-0.0555634	0.228339076692858	0.114246629749819	0.0952895662778273	0.135216390645444	0.202422141247906	0.215073941002024	0.270590668270422	0.179390229840796	0.252458584670043	0.128938490338691	-0.023794	0.068432700969707	0.0451749845231874	0.0316470634384611	-0.0563374	0.0119603021349201	0.0537974877451744	-0.0174481	0.391992900860738	0.390325918210306	0.211523747241182	0.0993682959537267	0.169566938069224	0.316433611017402	0.344004011094298	0.257167174582292	0.205269403266106	0.0100027328353542	0.173261826961586	0.939224983187822	0.0270663226781672	0.372519528465023	1.52918237555998e-08	0.0309719586776422	0.212995910920779	0.499217064843117	0.361034970978241
m6A_reader	YTHDC2	0.132739425321886	-0.13546	-0.107583	0.111545289986523	0.0206421214683386	0.0270613187766132	0.0739486223717225	0.0436260858280737	0.332092564206433	0.147471714053595	0.17372338853405	0.0421614072663943	-0.135023	0.0484758884294881	0.08285424543426	0.0424571261050791	0.103514	0.15499989024665	0.199559035653476	0.0811455112953057	0.269306093840466	0.0436112751100331	0.088973233836348	-0.138013	-0.139082	-0.15044	-0.0986689	0.309203659839866	0.133921015014748	0.367979721538201	0.328906861745592	0.29603628638025	0.235302610540211	0.391317270854698	0.30178206050021	0.179151574076214	0.200546097799573	0.0795406103410307	0.120655182779003	0.255514006737878	0.107774362078414	0.174626388022087	0.307368939028598	0.00405903148072213	0.642209324860129	0.538865293077358	0.19851714000276	0.55979880443673
m6A_reader	YTHDF3	0.391488397827115	-0.186152	0.0494248629877086	0.0760347860576822	0.0845697333049505	0.0168749824194989	0.193660775866049	0.0524066813762973	0.557018563928211	0.19948270167865	-0.0609752	0.0866072785726537	0.0335411333615004	0.0639200361722489	0.161429918162537	0.191171070734123	0.180256330736509	0.234635970397583	0.221518291585004	0.234019115909935	0.304998720466469	0.143536616573086	0.212963462418182	-0.0264666	0.00147924461290597	-0.00895331	0.0564721920074556	0.151571284806724	-0.0419044	0.163640099872956	0.31241006352064	0.289912581016443	0.276440523726899	0.236151967831272	0.255274463319091	0.156966975225002	0.210460633253026	0.134681852765718	0.166536932390559	0.449224149088379	8.64969463822186e-07	0.0610294179064066	0.639876846251247	0.0505287225244129	0.0565586504884784	0.701595555922612	0.00068659773343783	0.483517268016104
m6A_reader	IGF2BP1	-0.275604	-0.107551	-0.0745197	-0.175032	-0.106043	0.0818356508979385	-0.174922	0.0122125531805641	0.337031043135876	0.170077224435034	0.0949426036672613	0.124399277772687	0.121825088829347	0.109319407913551	0.29017277961573	0.076615891450216	0.079774453939707	0.131204384149941	0.137545116920862	0.154668632997317	0.130073767545989	0.0121560381435735	0.161928387563489	-0.0419871	-0.0279449	0.0944196583470274	0.0120089266906305	0.238443605864966	0.163889543839167	0.302286938630929	-0.0320441	0.00921899061923214	0.324762705463661	0.289125191179752	-0.176366	0.009939295454975	-0.122103	-0.0115853	0.146790536026359	0.360919859332843	0.000698049254476893	0.281949407628052	0.480202145371898	5.89956029478784e-06	0.0166972178968949	0.0627200433395509	0.00220647117679711	0.870383900335788
m6A_reader	LRPPRC	-0.140129	-0.224741	-0.416489	0.168799105220141	0.119618988776399	-0.0588201	0.0126382025413095	0.00046697441236759	0.503658650457096	0.341653033733875	0.0650272569138995	0.427873337318216	0.29134853750592	0.180430532934123	0.46554705315743	0.248830913041213	0.216155527487067	0.296551345137394	0.243200486108701	-0.0207223	0.172848011052862	0.0501472813552323	0.102866860327735	0.0209046215627677	-0.0503134	0.150139332226375	0.051056544593573	0.105553185856206	0.0309191307832843	0.207922292410706	0.0508887780157161	0.280961598137172	0.439960886442313	0.297639281988639	0.0483663014386665	0.292825106481488	0.277738795003226	0.0809611517570263	0.237995448478599	0.285677103620938	0.0893795261883224	0.0231512492729372	3.63601080924834e-05	1.2639564193051e-05	0.00689653519994123	0.181338009739513	0.826295183259118	0.99502205247617
[truncated: 32 more columns]

## Sheet: Table SX
Table SX. The correlation and P-values between the expression level of EFNA3 and mRNA methylation regulatory factors in ACC.
Type	Gene	Adrenocortical carcinoma
m6A_reader	HNRNPC	0.578275903781275
m6A_eraser	ALKBH5	0.534868204521674
m5C_writer	NSUN6	0.527211041577062
m6A_reader	HNRNPA2B1	0.497050811433952
m6A_reader	ELAVL1	0.479188993984803
m6A_writer	METTL3	0.477239448475579
m1A_reader	YTHDF2	0.455462799805477
m6A_reader	YTHDF2	0.455462799805477
m6A_reader	LRPPRC	0.439960886442313
m5C_reader	ALYREF	0.436304909883237
m5C_writer	DNMT1	0.432827866388802
m5C_writer	NSUN5	0.428324661517255
m1A_writer	TRMT6	0.423873888147113
m5C_writer	DNMT3A	0.410667816306184
m6A_writer	RBM15	0.398969898785936
m1A_reader	YTHDF1	0.382399338855885
m6A_reader	YTHDF1	0.382399338855885
m5C_writer	NSUN4	0.379424359786611
m6A_writer	RBM15B	0.370770660145511
m1A_reader	YTHDC1	0.368207757491767
m6A_reader	YTHDC1	0.368207757491767
m5C_writer	NOP2	0.36567799194235
m1A_writer	TRMT61B	0.35775018125309
m1A_eraser	ALKBH1	0.351172402293459
m1A_writer	TRMT10C	0.336654151179657
m6A_reader	IGF2BP1	0.324762705463661
m1A_eraser	ALKBH3	0.30800803779087
m6A_writer	CBLL1	0.291733308087258
m6A_writer	WTAP	0.290894691950532
m5C_writer	NSUN3	0.289890538469682
m1A_reader	YTHDF3	0.276440523726899
m6A_reader	YTHDF3	0.276440523726899
m5C_writer	NSUN2	0.267638661434402
m6A_writer	ZC3H13	0.267350516391367
m5C_eraser	TET2	0.26472076088893
m5C_writer	NSUN7	0.253429045357737
m6A_writer	KIAA1429	0.243931108730019
m5C_writer	TRDMT1	0.23600127806899
m6A_reader	YTHDC2	0.235302610540211
m6A_eraser	FTO	0.222300846501411
m1A_writer	TRMT61A	0.220286701190891
m6A_writer	METTL14	0.177217602045064
m5C_writer	DNMT3B	0.100960340127212
m6A_reader	FMR1	0.0993682959537267
